# Supplementary material for: Conferring an adhesion layer with mineralization-inducing capabilities for preparing organic–inorganic hybrid microcapsules
Source: Royal Society of Chemistry journal article supplement (doi:10.1039/c3tb21202e), 2013-12-06
Supplement: c3tb21202e.pdf [file c3tb21202e.pdf]

## Supporting information

### **Conferring the adhesion layer with mineralization-inducing capability for preparing organic-inorganic hybrid microcapsules**

Wenyan Zhang,<sup>a</sup> Jiafu Shi,<sup>b,c</sup> Xiaoli Wang,<sup>a</sup> Zhongyi Jiang\*,<sup>a,b</sup> Xiaokai Song,<sup>a</sup>

Qinghong Ai,<sup>a</sup>

<sup>a</sup> Key Laboratory for Green Chemical Technology of Ministry of Education, School of Chemical Engineering and Technology, Tianjin University, Tianjin 300072, China.

<sup>b</sup> Collaborative Innovation Center of Chemical Science and Engineering (Tianjin), Tianjin 300072, China.

<sup>c</sup> School of Environment Science and Engineering, Tianjin University, Tianjin 300072, China.

\*To whom correspondence should be addressed. Tel: 86-22-27406646; Fax: 86-22-23500086; E-mail: zhyjiang@tju.edu.cn

## Experimental details

### *Thermal denaturation kinetic*

The thermal denaturation constants ( $k_d$ ) were calculated from the first order exponential approach Eq. 1:

$$A_{cat}/A_{cat,0} = \exp(-k_d t) \quad 1)$$

where  $A_{cat,0}$  was the CAT activity before incubation,  $A_{cat}$  was the CAT activity after incubation at a certain temperature for a certain time and  $t$  was the incubation time.

The half-life ( $t_{1/2}$ ) value for CAT thermal denaturation was determined from Eq. 2:

$$t_{1/2} = \frac{\ln 2}{k_d} \quad 2)$$

The activation energy ( $E_d$ ) for CAT thermal denaturation was determined by applying the Arrhenius equation Eq. 3:

$$\ln k_d = -E_d/R + \ln C \quad 3)$$

The  $E_d$  was calculated by the plot of log denaturation rate constants ( $\ln k_d$ ) versus reciprocal of the absolute temperature ( $T$ ) from Eq. 4:

$$\text{Slope} = E_d/R \quad 4)$$

The change in enthalpy ( $\Delta H^0$  kJ mol<sup>-1</sup>) for CAT thermal denaturation was determined using the Eq. 5:

$$\Delta H^0 = E_d - RT \quad 5)$$

where  $R$  was the gas constant (8.3145 J mol<sup>-1</sup> K<sup>-1</sup>) and  $T$  was the corresponding absolute temperature.

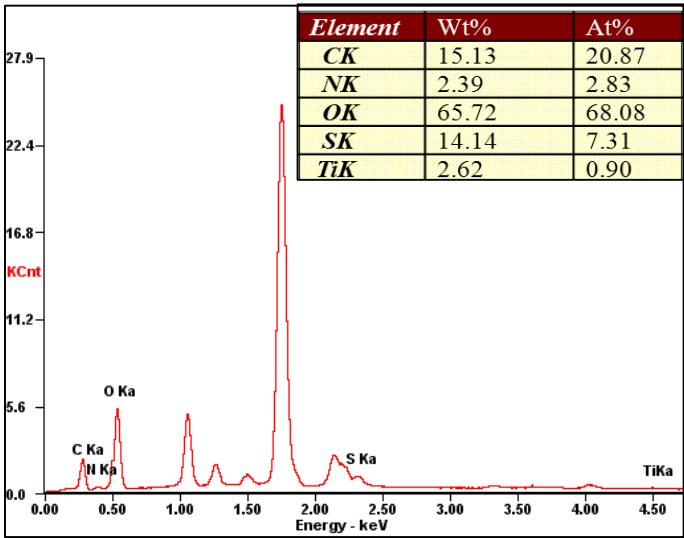

a)

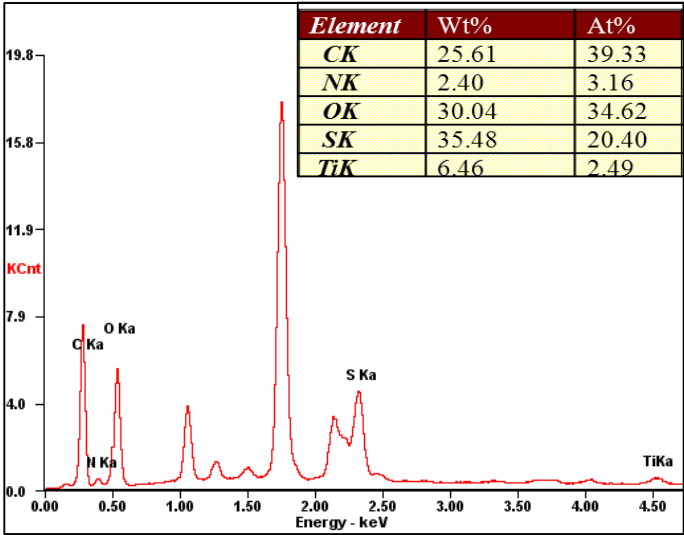

b)

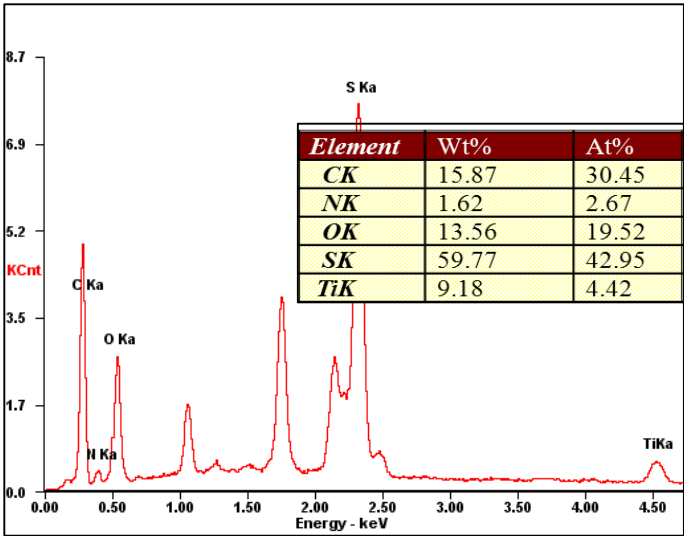

c)

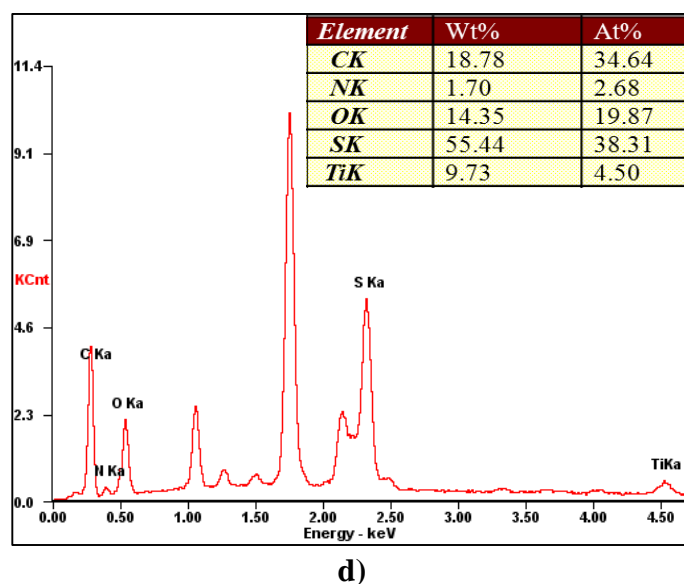

**Fig. S1.** EDS of the PDA/cysteamine/Ti microcapsules prepared with different concentration of cysteamine (a) 2 mg mL<sup>-1</sup> (b) 8 mg mL<sup>-1</sup> (c) 16 mg mL<sup>-1</sup> (d) 24 mg mL<sup>-1</sup>.

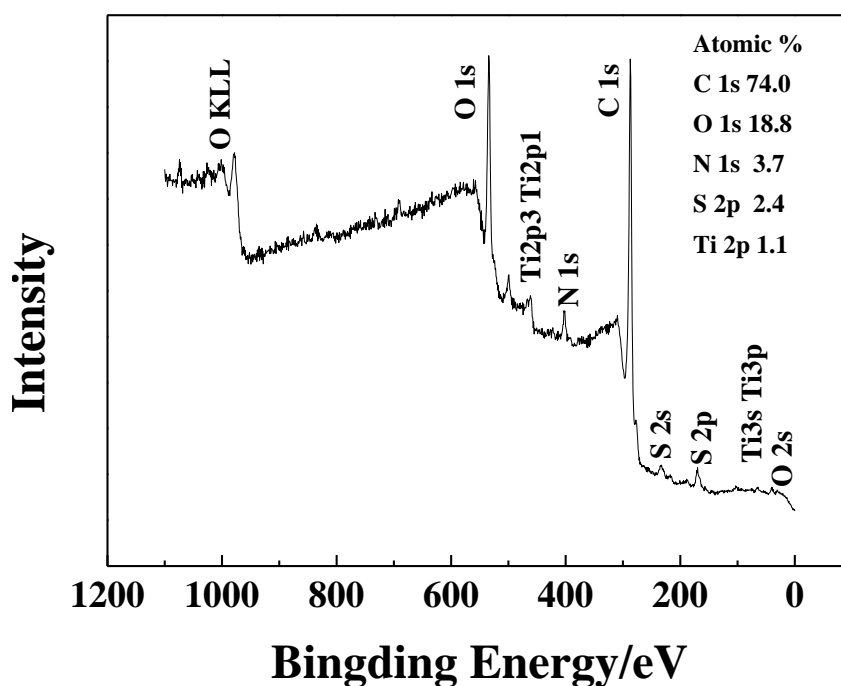

**Fig. S2** XPS spectra of the PDA/cysteamine/Ti microcapsules

X-ray photoelectron spectroscopy (XPS) was utilized to further confirm the existence of cysteamine in the PDA/cysteamine/Ti microcapsules. There were C, O and N

elements in the XPS survey spectrum of the pure PDA microcapsules.<sup>1</sup> As shown in Fig. S2, there were C, O, N, S and Ti elements in the XPS survey spectrum of PDA/cysteamine/Ti microcapsules. The S element should be originated from cysteamine.

## References

1. L. Zhang, J. Shi, Z. Jiang, Y. Jiang, S. Qiao, J. Li, R. Wang, R. Meng, Y. Zhu and Y. Zheng, *Green Chem.*, 2011, 13, 300-306.
